# Supplementary material for: An ovarian spheroid based tumor model that represents vascularized tumors and enables the investigation of nanomedicine therapeutics
Source: Royal Society of Chemistry journal article supplement (doi:10.1039/c9nr09572a), 2019-12-19
Supplement: c9nr09572a1.pdf [file c9nr09572a1.pdf]

## Supporting Information

### Ovarian Spheroid Based Tumor Model Represents Vascularized Tumor and Enables the Investigation of Nanomedicine Therapeutics

Manu Smriti Singh<sup>a,b,c,d,e</sup> Meir Goldsmith<sup>a,b,c,d,e</sup> Kavita Thakur<sup>f,g</sup> Sushmita Chatterjee<sup>a,b,c,d,e</sup> Dalit Landesman-Milo<sup>a,b,c,d,e</sup> Tally Levy<sup>a,b,c,d,e,g,h</sup> Leoni A. Kunz-Schughart<sup>i,j</sup> Yechezkel Barenholz<sup>k</sup> and Dan Peer<sup>\*a,b,c,d,e</sup>

<sup>a</sup> Laboratory of Precision NanoMedicine, Tel Aviv University, Tel Aviv 69978, Israel

<sup>b</sup> School of Molecular Cell Biology & Biotechnology, George S. Wise Faculty of Life Sciences, Tel Aviv University, Tel Aviv 69978, Israel

<sup>c</sup> Department of Materials Sciences & Engineering, Iby and Aladar Fleischman Faculty of Engineering, Tel Aviv University, Tel Aviv 69978, Israel

<sup>d</sup> Center for Nanoscience and Nanotechnology, and Tel Aviv University, Tel Aviv 69978, Israel

<sup>e</sup> Cancer Biology Research Center, Tel Aviv University, Tel Aviv 69978, Israel

<sup>f</sup> Department of Pathology, Tel Aviv Sourasky Medical Center, Tel Aviv 62431, Israel

<sup>g</sup> Sackler Faculty of Medicine, Tel Aviv University, Tel Aviv 69978, Israel

<sup>h</sup> Gynecologic Oncology Unit, Department of Obstetrics and Gynecology, E. Wolfson Medical Center, Holon, Israel

<sup>i</sup> OncoRay - National Center for Radiation Research in Oncology, Faculty of Medicine and University Hospital Carl Gustav Carus, Technische Universität Dresden and Helmholtz-Zentrum Dresden-Rossendorf, Fetscherstr. 74, 01307 Dresden, Germany

<sup>j</sup> National Center for Tumor Disease (NCT), Partner Site Dresden, Fetscherstr. 74, 01307 Dresden, Germany

<sup>k</sup> Laboratory of Membrane and Liposome Research, Department of Biochemistry and Molecular Biology, Institute for Medical Research Israel-Canada (IMRIC), The Hebrew University-Hadassah Medical School, Jerusalem, Israel

Correspondence should be addressed: [peer@tauex.tau.ac.il](mailto:peer@tauex.tau.ac.il)

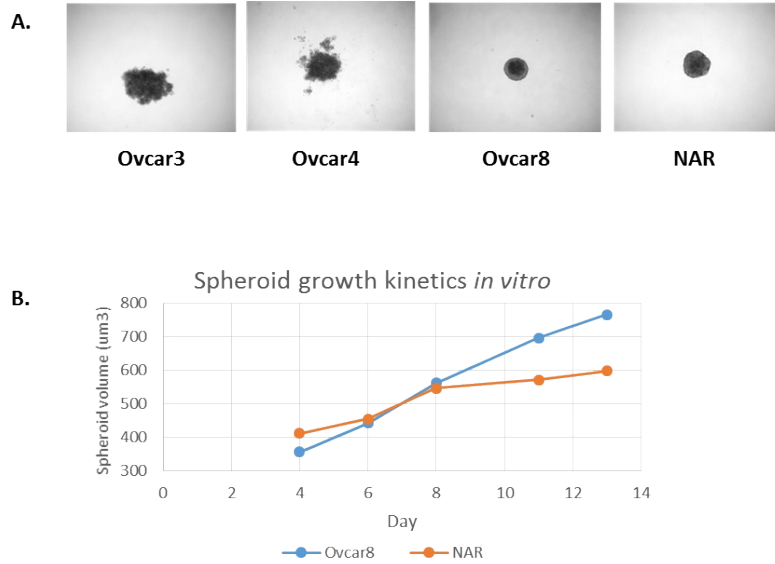

**Figure S1. Characterization of Spheroids in vitro.** **A.** 2000 cells were seeded in ultra low attachment 96 –well plate to screen for their ability to form spheroid and observed under microscope after 4 days. Ovc3 and Ovc4 formed loose aggregates whereas spheroids of Ovc8 and NAR appeared round and robust (Phase-contrast Microscope Zeiss Axiovert 200/M). **B.** Growth kinetics of Ovc8 and NAR spheroids formed post-seeding 2000 cells per well on day 0 (n=15, 3 independent experiments). Ovc8 spheroids exhibited higher growth kinetics than NAR in terms of spheroid volume.

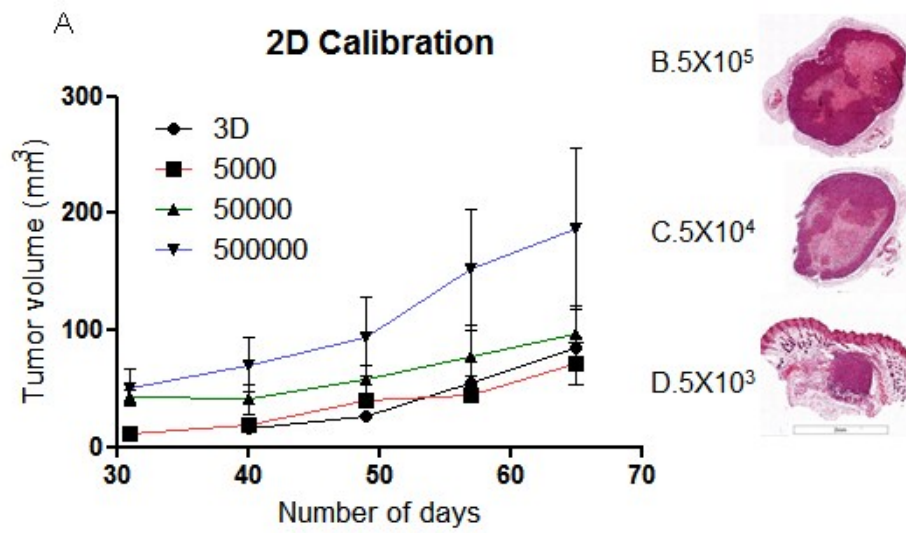

**Figure S2.** Optimization of 2D model. **A.** Growth kinetics H&E sections of *in vivo* tumor injected with **B.**  $5 \times 10^5$  cells (Day 35),  $5 \times 10^4$  cells (Day 58),  $5 \times 10^3$  cells (Day 58),  $n=3$ , Scale 2mm.

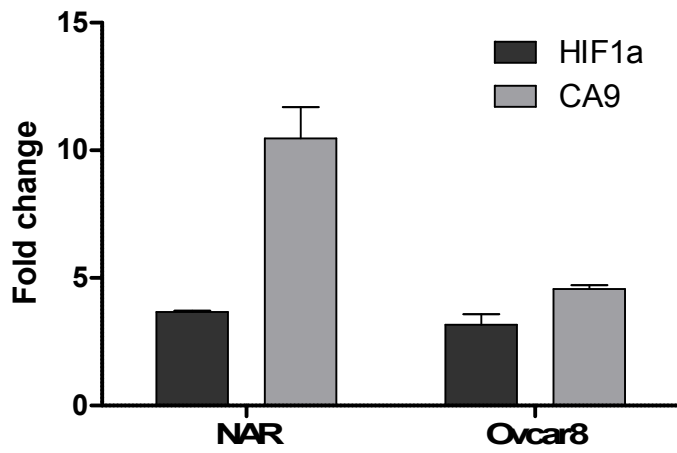

**Figure S3.** Relative Quantification of genes in 3D spheroids (day 4) as compared to cell lines grown as 2-dimension culture. Both the hypoxia-related genes CA9 and HIF1 $\alpha$  are expressed 3-10 fold more when grown as 3D spheroids.

## Doxil® composition

|                     |                                                                       |
|---------------------|-----------------------------------------------------------------------|
| Total Lipids        | 15.6 mg/mL                                                            |
| Lipids Ratio        | Cholesterol 18.8 % (w/w)<br>HSPC 60.4% (w/w)<br>MPEG-DSPE 20.8% (w/w) |
| Encapsulation       | 94.2%                                                                 |
| Drug-to-Lipid Ratio | 0.13 mg/mg                                                            |

**A**

| Z-Average<br>(d), (nm) | PDI  | ζ-Potential<br>(mV) |
|------------------------|------|---------------------|
| 81                     | 0.06 | -31                 |

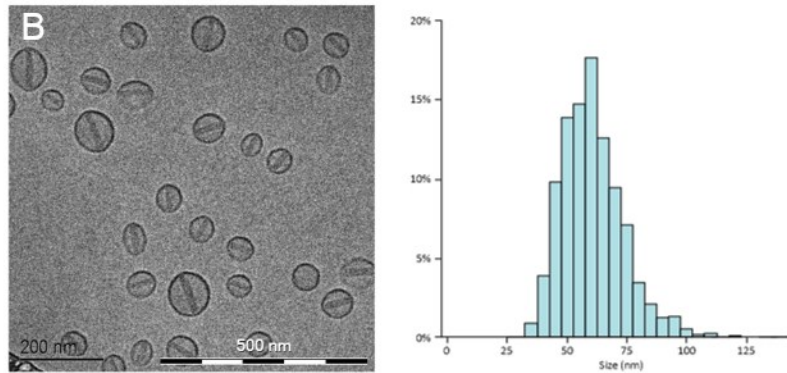

| No. of Images | No. of Particles | Mean Size (nm) | Unilamellar Liposomes (%) | Elongatedness (Aspect Ratio) |
|---------------|------------------|----------------|---------------------------|------------------------------|
| 16            | 1260             | 61 ± 13        | 99                        | 1.17 ± 0.14                  |

**Figure S4. Characterization of Doxil: A.** Physicochemical Characterization, **B.** Cryo-Transmission Electron Micrograph (TEM) Analysis

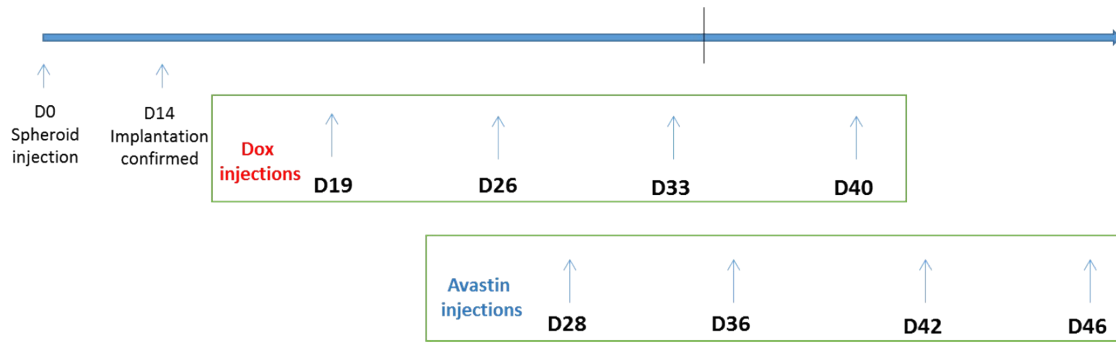

**Figure S5.** Scheme of experiment and treatment with following groups- 1. Control, 2. S-Dox, 3. Doxil, 4. Avastin, 5. Avastin and S-Dox, 6. Avastin and Doxil.
